# Supplementary material
Source: PubMed Central journal article supplement (PMC1073678)
Supplement: mbc_E04-06-0442_1.pdf [file mbc_E04-06-0442_1.pdf]

```

Agn1p MKLVL----FLVLLFSALINL-----TNADKMVAHFIVGN-TYPYTVSNWEEDIQDA 48
Th MutA MLGVVRRRLGLGALAAAALSSLGSAAPANVAIRSLEERASSADRLVFCHFMIIGIVGDRGSSADYDDDMORA 70
Pp MutA M-----KVSSAFAATLSAI-IAACSAALPSDSMVSRRRSTSDRLVFAHFMVGI VSDRTSASDYDADMOGA 62

Agn1p IAVGIDGFALNMGSDAWQVERIEDAYDAAA SVSSDFKLFISFDMSI- ISADDFIEGVVRRFADKPNOLY 117
Th MutA KAAGIDAFALNIGVDGYTDOOLGYAYDSADR--NGMKVFI SFDFNWWSPGNAVGVGOKIAOYASRPAOLY 138
Pp MutA KAYGIDAFALNIGTDTFSDOOLGYAYESAAN--NDMKVFI SFDFNWWSSTQATEIGOKIAOYGSLLPGQLM 130

Agn1p YDGKVFVSTFAGETDTFGYSDVSTGWDSAVKEPLASAGYPIYFVPSWTSLGQGALEESVADGFLSWNAWP 187
Th MutA VDNRPFASSFAGD-----GLDVNALRSAAGSNVYFVPNFHPGQSSP-SN--IDGALNWMAWD 192
Pp MutA YDDKIFVSSFAGD-----GVDVAALKSAAGGNVFFAPNFHPSYGTDLSD--VDGLLNWMGWP 185

Agn1p TTDADMN-----DNDDIGYQNLANSLGKLYVAPVSPWFYTHL----SY-KNWAYKSDWLIIDRWNE 243
Th MutA NDGNNKAPKPGQTVTVADGDNAYKNWLG--GKPYLAPVSPWFFTHFGPEVSYSKNWVFPGGPLIYNRWQO 260
Pp MutA SNGNNKAPTAGANVTVEEGDEEYITALD--GKPYIAPASPWFSTHFGPEVTYSKNWVFPDILLFYORWND 253

Agn1p MLSVQPDMEVLTWNDYGESHYIGNIOGA-LPAGSEGYVDGFDHTAWRYLMSPTYISAYK---LGLSEPYI 309
Th MutA VLQQGFPMVEIVTWNDYGESHYVGPLKSKHFDDGNSKWNNDMPHDGFLDL SKPFI AAYKNRDTDISK-YV 329
Pp MutA LLNLGPQFIEVVTWNDYGESQYVGPLNSPHTDDGSSRWANDMPHDGWL DLAKPYIAAFHDGATSLSSSYI 323

Agn1p NFESLFYWYRPTPK-----SATATADSLSYPSGCDY-----MEDEIFVLVYLLQSAEVTVTCGST 364
Th MutA QNEQLVYWYRRNLKALDCDATDTTSNRFPANNNGSGNYFMGRPDGWQTMDDTVYVAALLKTAGSVTVTSGGT 399
Pp MutA TEDQLIYWYRPPRLMDCDATDT-CMVAANNDTGNFYEGRPNGWESMEDAVFVVALLOSAGTVQVTSQPN 392

Agn1p TOTFSGVPGVNOFTIIPMETNASPSFTVARQGGTLASGTGPEIVDSL---SIYNFNAYTGVL----- 422
Th MutA TOTFOANAGANLFOIPASI-GQOKFALTRNGQTVFSGTSLMDITNVCSGCIYNFNPIYVGTIPAGFDDPLQ 468
Pp MutA TETFDAPAGASAFQVPMGF-GPQSFSLSRDGETVLSGTSLKDIIDGCLCGIYNFNAYVGSLLPATFSDFLE 461

```

# A

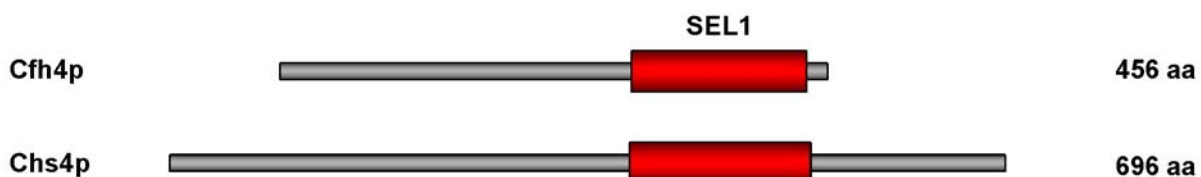

# B

Cfh4p MPASTSIPETPSKLPDALLVN-SDPASKVDNVSVKIEQE-----SPLALEGSPLPTV 51  
 Chs4p MASSPQVHPYKKHLMOSQHINFDNRGLQFQNSSLKVGQDFSDNKENRENRDNEFDSTADLPKRSAOPLI 70

Cfh4p SDVLP-----ETNNAHEE----VSSSSWSLSSSDSIMSYDSLSD----- 86  
 Chs4p NEHLRAASVPLLSDNIGNSQEEDFVPPPPQLHLNNSNNT-SLSSLGSTPTNSPSGALRQTNSSTSLTK 139

Cfh4p -----DVSVLSFLDCPLTTF--FETAPSIASFNSAADVSSHRSSSSWSAKLS----- 132  
 Chs4p EQIKKRTRSVDLSHMYLLNGSSDTQLTATNESVADLSHQMI SRYLGGKNNTSLVPRLKT IEMYRQNVKKS 209

Cfh4p -----RFTKHASKPSLSSNSSDSSFSGSESNALSSRGSFEL--EPHGIHRHVS----RAKRLLSK 188  
 Chs4p KDPEVLFQYAQYMLQATLTISSNALVQDSDKEGNVSDLDKLOFLKEAQSYLKKL SIKGYSDAQYLLAD 279

Cfh4p FYS----KFHHKKEDSSFDP LAPL VFAPNTRVLRVTNEANASAI SLEKATSL----SSQEQPGSEIKK 249  
 Chs4p GYSSGAFGKIENKEAFVLFQAAA AKHGHI ESAYRASHCLEEGLGTTDRSRKSVNFLKFAASRNHPSAMYK- 348

Cfh4p ELSLYDHEFDQILD LAIKAKKDGNLENAIEFLEYIMPEVASQQNFVPYELAELYKQ---RGTSQDLKSIL 316  
 Chs4p -LGLY--SFYGRMGLPTDV--NTKL-NGVKWLSRAAARANELTAAAPYELAKIYHEGFLDVVIPDEKYAM 412

Cfh4p PLYMLAASLGHDRSSFLVGEAFFYGTYGARENKLRALQYHYHLANDKGNADAMLALCKLYLRGLPGHIFPS 386  
 Chs4p ELYIQAAASLGHVPSATLLAQIYETGNDTVGQDTSLSVHYITOAAALKGDVAMGLCAWYLLGAEPAFEKD 482

Cfh4p SRRAFEYAHRAAMLGHAPACYVLGKFYETGVGC-----VKDLAKSEAGF---- 430  
 Chs4p ENEAFQWALRAANAGLPKAQFTLGYFYEHGKGCDRNMEYAWKWYEKAAGNEDKRAINKLRSRDGGLASIG 552

Cfh4p -----RAGLINDSPIT-----DADALQI----- 448  
 Chs4p KKQHKKNKSI STLNL FSTVDSQTSNVGNSRVSSKSETFFTGPKRDREPQGLQINMNSNTNRNGIKTGS 622

Cfh4p -----ASTLV----- 453  
 Chs4p DTSIRKSSSSAKGMSREVAEQSMAAKQEVSLSNMGSSNMIRKDFPAVKTESKKPTSLKNKKDKQGKKKKD 692

Cfh4p -LLQ 456  
 Chs4p CVIM 696

**A**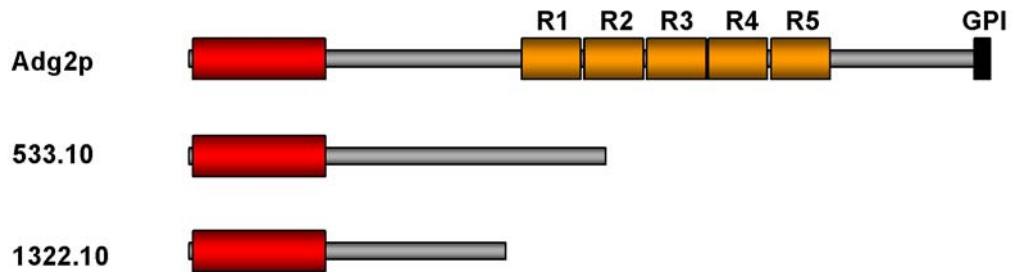**B**

|         |                                                                          |    |
|---------|--------------------------------------------------------------------------|----|
| Adg2p   | MRRLT-ISGLLISLAKLCA-GMEINVPSSSDVWTSGHIEPLEWSVVSTDPLOANVWLINEVEYPPTSRYI   | 68 |
| 553.10  | ML-FK-ISFLALIASAL---AMSINSPTNGDTWQTNGEEQITWNVVSTDEPSAALYLTNFVAVPTVTQYL   | 65 |
| 1322.10 | MLARV-GTTLFFLANALAAAYAVSVTSPTTRDTTWSGQVNTVTWSSVSTDPEEMVIMLVNNAHYPNQNFNL  | 69 |
| An      | MRSSI CFTVFAILLFDSLAA-AISITEPTANSTFAAGSTITVKWITVDTDPSYFSLYLWNFVSWPPSYIAL | 69 |
| Nc      | MRV----LALAALAAPLVS-ALQFTDPVANATLHKGETFDLKWSTVDTDPTDFSVYLVNFWVWPPYYTPL   | 65 |

|         |                                                                        |     |
|---------|------------------------------------------------------------------------|-----|
| Adg2p   | M-TINTFDENATFPALDLS--PGYGYOISF-TSIRDSDVIYAQSGTFYIVGG-EGISSTTGSTFQSM    | 130 |
| 553.10  | D-TVDTSTGSYTTNTTNWP--TGQGFQINM-AYPGRPEQIYAQSQQFNIV                     | 111 |
| 1322.10 | G-TVOSSAGSLDIDISSIDLPTDGWQIYFNGATSONQGS LAQSEQDFEG                     | 119 |
| An      | ALDVPSADESHTVQIPCDTN-PEWGYOLS-AINGTNVYI IYAQGERFTVSNPLNGSHC-VDSVPSDITC | 135 |
| Nc      | AYNIEPSSGELSVTIPCDID-SSYGWQFN-AINGTNVYVIYAQTPKFYIS----GGPCSVDSPPFTGAP  | 128 |

**C**

|    |                                                             |
|----|-------------------------------------------------------------|
| R1 | TGSTITIGSAT-VSSSPFYNSSSI-PTSVPSS--VSSFTSS---SSYTTTLTASNTSV  |
| R2 | TYTGTGTGSATFTSSPPFYNSSSI-PTSVPSS--VSSFTSS---NSSYTTTLTASNTSI |
| R3 | TYTGTGTGSATFTSSPPFYNSSSI-PTSVPSS--VSSFTSS---NSSYTTTLTASNTTV |
| R4 | TFGTGTGSATFTSSPPFYNSSSI-PTSAPSS--VSSFTSS---NSSYTTTLTASNTTV  |
| R5 | TFGTGTGSATATSSSPFYNSSSIIVPTTVSTSGSVSSFSSSPSPTSSFSGT-SALSSSS |

# A

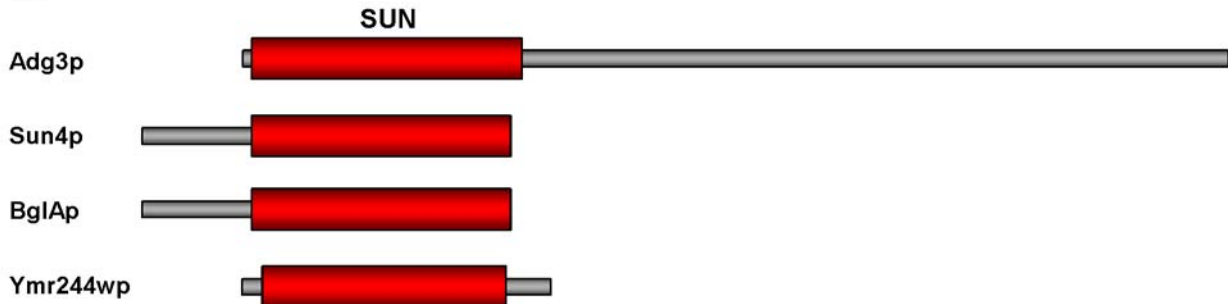

# B

|          |                                                                                   |     |
|----------|-----------------------------------------------------------------------------------|-----|
| Adg3p    | DTVQCA-FPYGDKMVAVTPDEGNAGWA-----MSPDOYCTAGTWCPYACEPGYLMGQWDPNATSYSITYE            | 131 |
| A.nid    | GS-SCA-FPTDAGLVAITPGKNGGWA-----MSPDQSEEPGNYCPYACPPGQVSMQWDPDATSYSYPM              | 102 |
| D.han    | GGNTCD-FPSNKGKLVSVTSKSSNGGWA-----MSPDQOCTEGNYCPYACPPGKLMQWDSATSYSYPE              | 89  |
| A.gos    | G--TCA-FPHGKGMVAVQTEGKNAGWA-----MHSDOECKPGTWCPYACPAQOLMGQWNPQVITAYITYG            | 91  |
| Ymr244wp | GG-TCA-FPNYDGMVAVQKGGSSNGGWA-----MSPDQEC SYGSWCPYACKPGQLMGQWDP SATTYSYPK          | 109 |
| Bgl1p    | GVISCSDFPVGGGVIPLNLLG-FGGWSGIYHSDTSTGGSCTEGSYCSYACQPGMSKTQWPSDQPA---NG            | 232 |
| SUN4p    | GTIPCGQFSPSGQGVIPISWLD-EGGWSGVENTDSTGGSCKEGSYCSYACQPGMSKTQWPSDQPS---DG            | 231 |
|          |                                                                                   |     |
| Adg3p    | SMYGGLYCNSDGVAVKPFPSKDY-CYPGVGDLVVDQT-GDGI AFCQTVLPGNEAML IPTLVVAPDSEQVL          | 199 |
| A.nid    | SMNGGLYCNEDGEIEKPFDPKPY-CRDGTGAVEAVNKC-GDVV SFCQTVLPGNEAML IPTLVEEVS--TL          | 168 |
| D.han    | SQNGGLKCNODGTVSKPFSNKDY-CVDGKGTVEVNNKA-SDNVAF CQTVLPGNEAML IPTLVV DGGSGTOTL       | 157 |
| A.gos    | SMEGGLFCDESGNLOTYPYDPKPY-CYDGKGTVIAENKA-GADVAF CQTVLPGNEAML IPTLVGGGSSOTL         | 159 |
| Ymr244wp | CQNGGLYCD SNGNLQKPN SDKDY-CYDGKGTVIAKNNA NSGDVAF CQTVLPGNEAML IPTLVGSGSKOTL       | 178 |
| Bgl1p    | VSVGGLLCKG-GKLYKSSS-SDYLCEWGVDAARV VSEI-SDVVSI CRTDYPGTENMVIPTAVEGGDEAIL          | 299 |
| SUN4p    | RSIGGLLCKD-GLYRSNTD TDYLCEWGVDAAYVVSEL-SNDVAICRTDYPGTENMVIPTVYVQAGDSLPL           | 299 |
|          |                                                                                   |     |
| Adg3p    | AVPDIS-Y--WDE--TAAHYV NPPGVSTTDGCVWGT SANPYGNWAPYVAGANMDENNITYVKLGANPIY           | 264 |
| A.nid    | AVPDL S-Y--WCE--TAAHFYINPPGKDPETACVWGTSSNPWGNWAA YVAGANTDGDGNTFVKIGWNP IY         | 233 |
| D.han    | AVPGSD-Y--WDG--TAAHYV INPPGVSTTDGCVWGT KDKSQGNWAPYVAGANMDDSGKTYVKIGWNP KY         | 222 |
| A.gos    | AVPGTD-Y--WAG--TAAHYV NPPGVSVKDACTWGTKENARGNWAPYV TGANQDAEGNTFVTVGWNP IY          | 224 |
| Ymr244wp | AVPGTD-Y--WAS--SASHYV NAPGVSVEDACOWGSSANPOGNWAPFVAGSNMDDNONTFVKIGWNP VY           | 243 |
| Bgl1p    | TVVNGETYYQWEGMTTSAQYV VNNAGVSYEDGCIWGD SNGDIGNWAPLNFAGYDGC-GISYLSLIPNP--          | 366 |
| SUN4p    | TVVDQDTYYTWOGLKTS AQYV VNNAGT SVEDACVWGS SSSGVGNWAPLNFAGYDGC-GVAYLSLIPNP--        | 366 |
|          |                                                                                   |     |
| Adg3p    | LDDSY-WSTVKPTYGLALECEGDT-CSGLPCYVDPRENGVQG--CPEGSP I GAGGACFCVVGFOQGT IAK         | 330 |
| A.nid    | LEDTPFRSTRPDFGVEIECDGDG-CNGLPCKIDPAENDVNEVT--GSSSDGAGGANFCVVTVPKGEKAR             | 300 |
| D.han    | IDD--FSNKKPNEGTRVTC D-DGDCDGLDCEIDPSKTGYNGV--SGSSSGKQEGASYCIVTAKNKSKAO            | 286 |
| A.gos    | LEPETPFRNVKPSYGLRIVCDNEEDCVGLPCGIDPSVNGVNEIQ--GSGSTGAGGANFCVVTAKKGAKAR            | 292 |
| Ymr244wp | LESSCPFKNVKPSFGIRITCDDESOCEGLPCSIDPSSNGVNEVTSSGSSSGAGGGNFCVVTARNGAKAN             | 313 |
| Bgl1p    | -NNKNAL-----NFNVKI IAYDDKSNVNGECVYE-----NGSYNGDGDGCTVAVTSG-KAK                    | 416 |
| SUN4p    | -NNGNAL-----NFNVKI IVAADSSSTVNGECIYE-----NGSFSG-GSDGCTVSVTAG-KAK                  | 415 |
|          |                                                                                   |     |
| Adg3p    | I VVV D YSEEMASSSSSA-----SAT                                                      | 350 |
| A.nid    | L V V F D S S S G S                                                               | 310 |
| D.han    | I E V F S T                                                                       | 292 |
| A.gos    | V E V F S T G G --- NAKRSL EHTHN-RGNLSDI H-RTVTTIAMN                              | 328 |
| Ymr244wp | I E V F D V G S G S S S K G K R E L N P L D V I T T V T E T K Y K T V T V T A K T | 355 |
| Bgl1p    | Y V L Y                                                                           | 420 |
| SUN4p    | F V L Y N                                                                         | 420 |

## SUPPLEMENTARY FIGURE LEGENDS

**Fig. S1. Alignment of Agn1p with the catalytic domain of  $\alpha$ -glucanases.** Agn1p shows sequence similarity to the catalytic domain of  $\alpha$ -glucanases (mutanases) from *Trichoderma harzianum* (Th MutA, AAF27911) and *Penicillium purporogenum* (Pp MutA, AF214481). The complete amino acid sequence of Agn1p was aligned with the catalytic domains of *T. harzianum* MutAp (from 1 to 468) and *P. purporogenum* MutAp (1 to 461) using the CLUSTAL program. Black boxes indicate sequence identities and dashes indicate gaps.

**Fig. S2. Domain architecture and alignment of Cfh4p with the *S. cerevisiae* Csh4p.** (A) Domain architecture of Cfh4p and Csh4p. Both proteins contain a SEL1 domain, a subfamily of the tetratricopeptide repeat (TPR) proteins. (B) Sequence alignment of Cfh4p and Csh4p. Cfh4p shows low sequence similarity (17.6% identity) to the *S. cerevisiae* Csh4p (CAA84882), which is more apparent in the SEL1 domain (double underlined). Global alignment of the two sequences was performed using the ALIGN program. Black boxes indicate sequence identities and dashes indicate gaps.

**Fig. S3. Domain architecture and similarities of Adg2p.** BLAST searches revealed the presence of a region at the N-terminal end of Adg2p (amino acids 1 to 130, red box) that shows sequence similarity to two *S. pombe* proteins of unknown function (SPCC553.10p and SPCC1322.10p) and to proteins from *Aspergillus nidulans* (XP\_407395) and *Neurospora crassa* (XP\_324909). (A) Domain architecture of Adg2p, SPCC553.10p (CAA19262) and SPCC1322.10p (CAA22863). The red box indicates the N-terminal region common to the three proteins. The orange boxes indicate the position of the five repeats present in Adg2p (R1 to R5), and the black box at the C terminus represents the putative GPI attachment site. (B) Alignment of the N-terminal region of Adg2p, SPCC553.10p (553.10), SPCC1322.10p (1322.10), *A. nidulans* (An) and *N. crassa* (Nc) proteins. The sequences were aligned using the CUSTAL program, with black boxes indicating sequence identities and dashes indicating gaps. (C) Alignment of the

five repeats of Adg2p. The sequence of the five repeats present in Adg2p were aligned using the CUSTAL program, with black boxes indicating sequence identities and dashes indicating gaps.

**Fig. S4. Domain architecture and similarities of Adg3p.** (A) Domain architecture of Adg3p and similar proteins. Adg3p contains a domain at the N-terminus (amino acids 69-350, red box) that belongs to the SUN family of proteins, followed by a large region (amino acids 350-1131) which is Ser/Thr-rich (51% of the amino acids). The SUN domain is also present in other fungal proteins, such as *S. cerevisiae* Sun4p or Ymr244wp, or the putative  $\beta$ -glucosidase BglAp of *Candida wickerhamii*. (B) Alignment of the SUN domain of Adg3p and related proteins. The protein sequence of Adg3p was aligned using the CLUSTAL program with related proteins from *A. nidulans* (XM\_404863; A.nid), *Debaryomyces hansenii* (XM\_462085; D.han), *Ashbya gossypii* (NM\_209901; A.gos), *S. cerevisiae* (Ymr244p and Sun4p) and *C. wickerhamii* (BglAp). Black boxes indicate sequence identities and dashes indicate gaps.
